# Supplementary material for: Proximal GATA-binding sites are essential for human HSD3B1 gene transcription in the placenta
Source: PubMed Central journal article supplement (PMC5487343; doi:10.1038/s41598-017-04133-6), 2017-06-27
Supplement: 41598_2017_4133_MOESM1_ESM.pdf [file 41598_2017_4133_MOESM1_ESM.pdf]

## **Supplementary Information**

**Proximal GATA-binding sites are essential for human**

***HSD3B1* gene transcription in the placenta**

Tsai-Chun Lai, Hsiao-Fang Li, Yu-Shian Li, Pei-Yu Hung, Ming-Kwang Shyu, and

Meng-Chun Hu

## GATA2 ChIP-seq: LNCaP cells

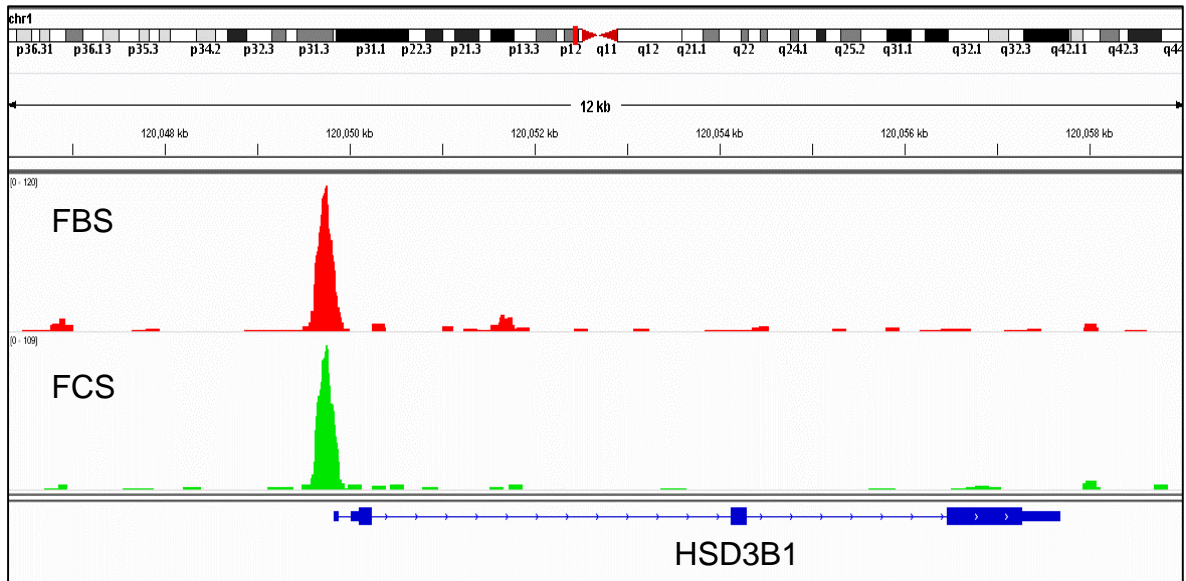

**Supplementary Figure S1.** Integrative Genomics Viewer shows GATA2 ChIP-seq results using the data set from GEO.

The GATA2 ChIP-seq data of LNCaP cells was published by Zhao et al. (16) and obtained from NCBI GEO database under accession number GSE69043. The GATA2 ChIP-peak was observed around the region -267/+104 of *HSD3B1* gene in LNCaP cells. FBS, foetal bovine serum (in the presence of androgen); FCS, foetal calf serum (in the absence of androgen).

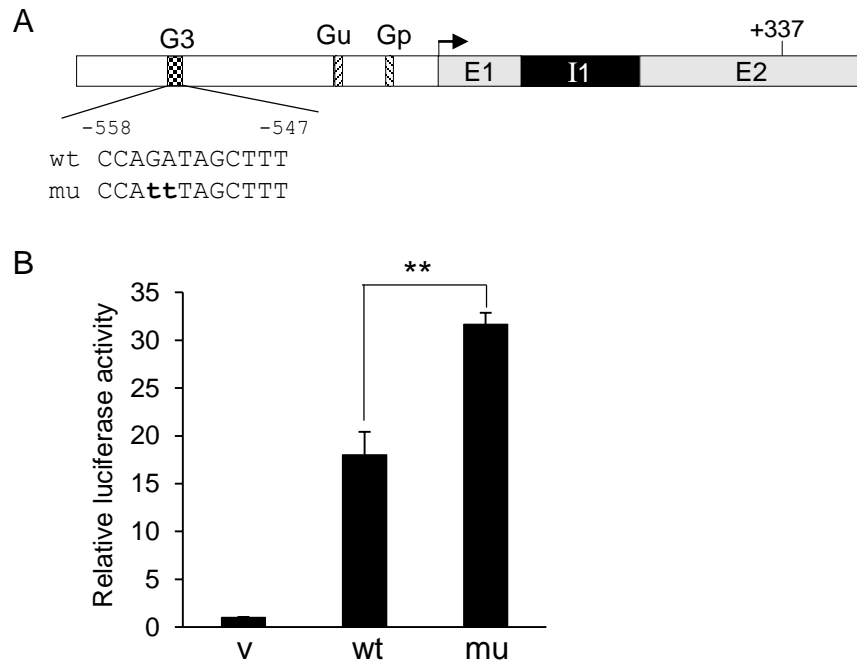

**Supplementary Figure S2.** Analysis of GATA-like binding site between -558 and -547 in *HSD3B1* promoter.

(A) Schematic of the promoter region in the *HSD3B1* gene. “+1” is the transcription start site indicated by the arrow. Two putative GATA binding sites, Gu and Gp, are shown in Fig. 2. The sequences of a GATA-like binding site at -558/-547 (G3) are shown with mutated nucleotides in lowercase letters. (B) JEG-3 cells were transiently transfected with the -1069/+337 *HSD3B1* promoter-luciferase construct containing wild-type or mutated GATA site in the G3. Results are presented as the activity relative to empty vector. Data are means  $\pm$  SD of three independent experiments. ).  $^{***}P < 0.01$  .

B

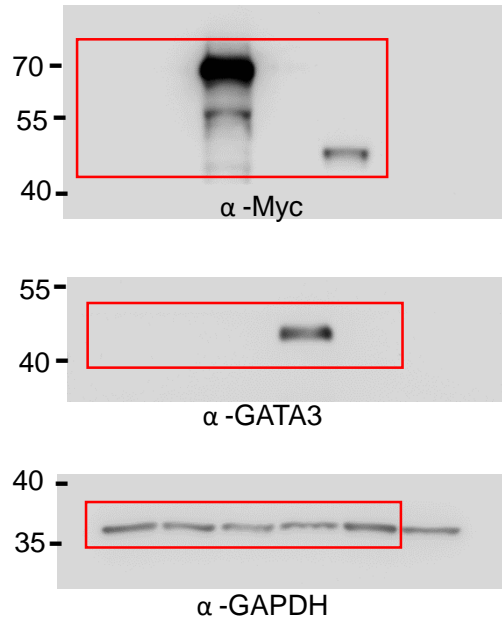

**Supplementary Figure S3.** Uncropped images of blots presented in the main Figure 3.

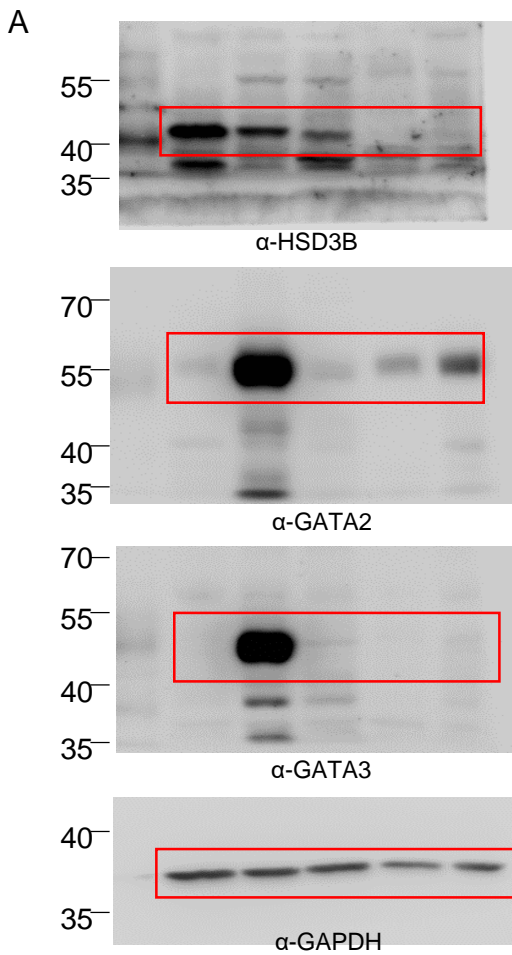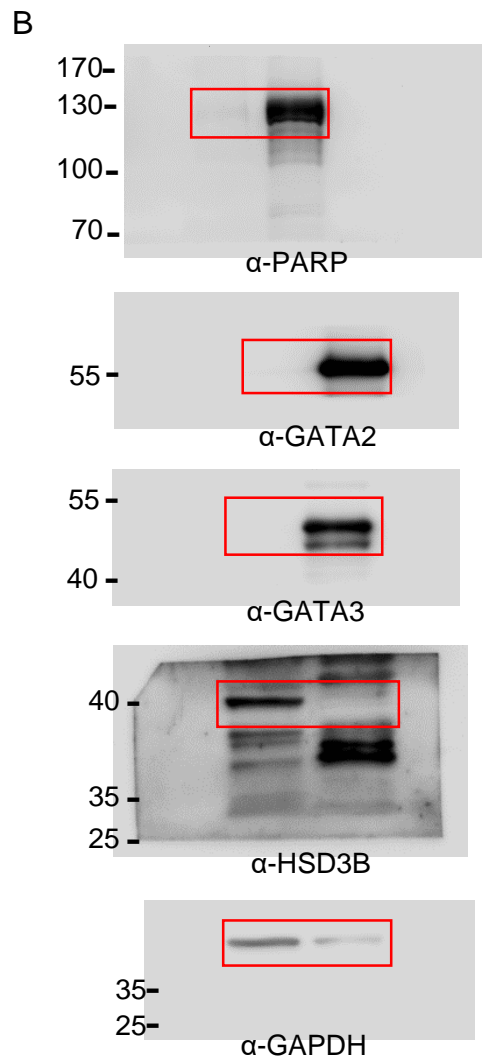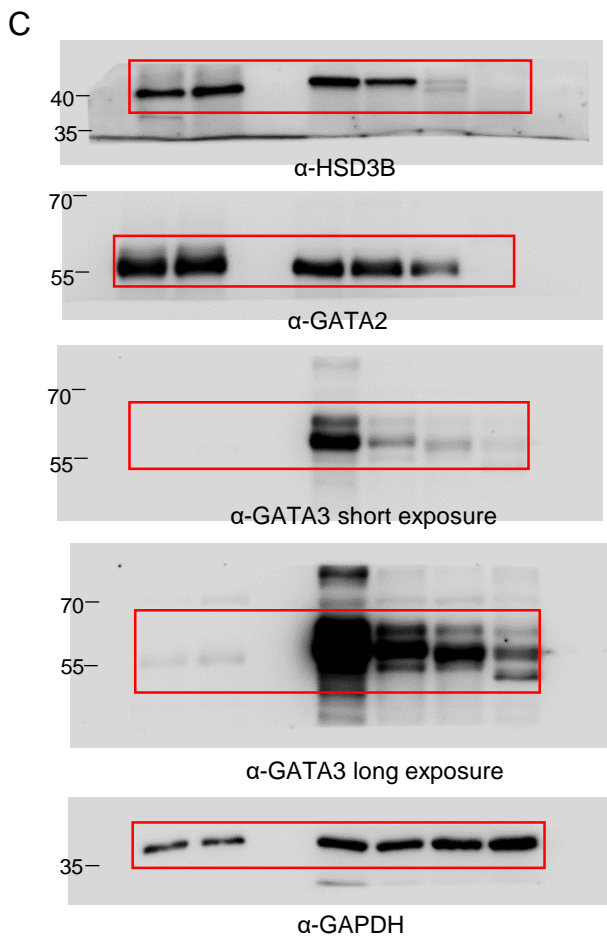

**Supplementary Figure S4.** Uncropped images of blots presented in the main Figure 4.

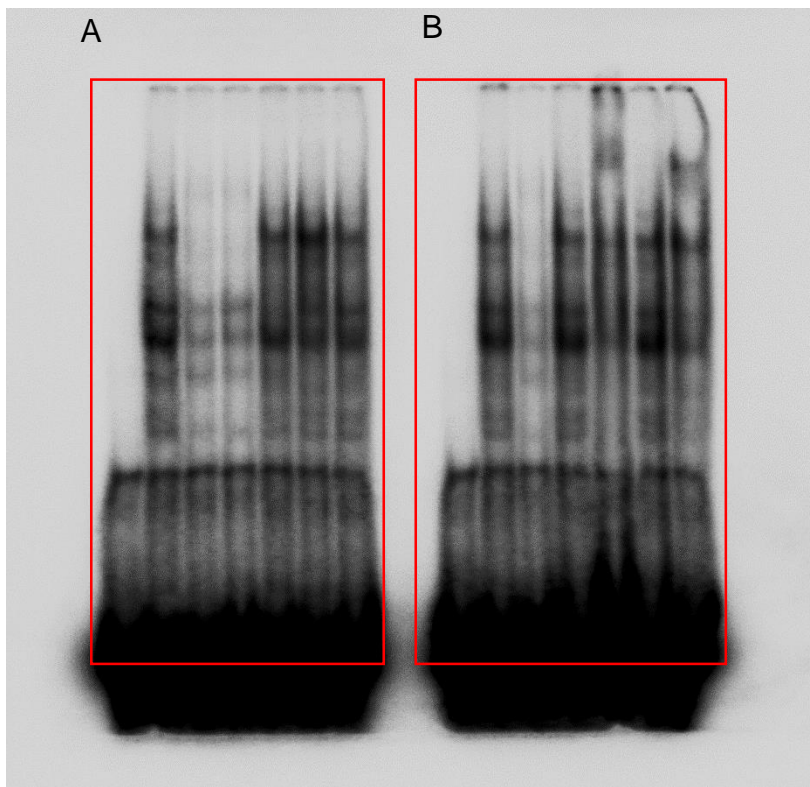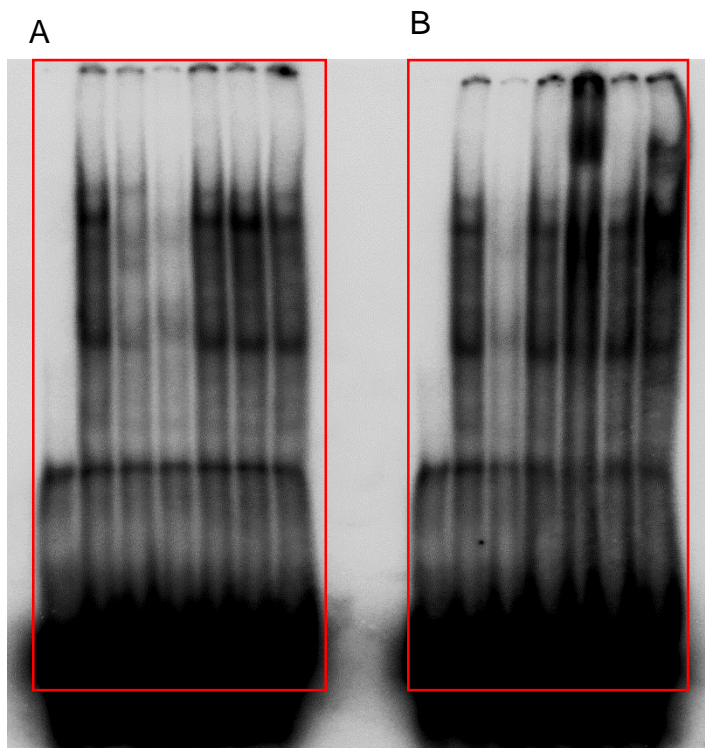

**Supplementary Figure S5.** Uncropped images of gels presented in the main Figure 5.

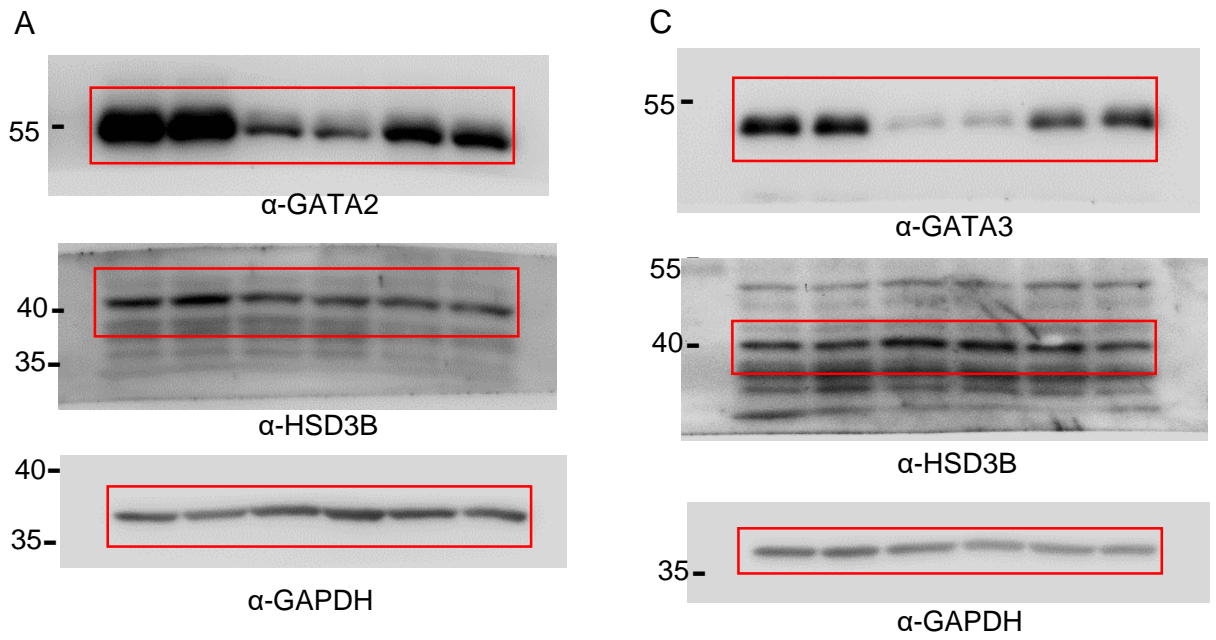

**Supplementary Figure S6.** Uncropped images of blots presented in the main Figure 6.
